# Supplementary material
Source: publisher site journal article supplement (https://www.dovepress.com/get_supplementary_file.php?f=436826.xlsx)
Supplement: Supplementary file 1 [file get_supplementary_file.php]

## Sheet: Sheet1
No.	Item	theme	category /theme from the main paper
PAM1	PAM1	beliefs	A belief that their role is important
PAM2	PAM2	beliefs	A belief that their role is important
PAM3	PAM3	Confidence	Have confidence and knowledge to act
PAM4	PAM4	Knoweldge	Have confidence and knowledge to act
PAM5	PAM5	Confidence	Have confidence and knowledge to act
PAM6	PAM6	Confidence	Have confidence and knowledge to act
PAM7	PAM7	Confidence	Have confidence and knowledge to act
PAM8	PAM8	Knoweldge	Have confidence and knowledge to act
PAM9	PAM9	Knoweldge	Taking action
PAM10	PAM10	beliefs	Taking action
PAM11	PAM11	Knoweldge	Taking action
PAM12	PAM12	Confidence	Staying on course under stress
PAM13	PAM13	Confidence	Staying on course under stress
References	Full staments can be obtained from Insigniah Health https://www.insigniahealth.com/		Hibbard JH, Mahoney ER, Stockard J, Tusler M. Development and testing of a short form of the patient activation measure. Health Serv Res [Internet]. 2005 Dec;40(6 Pt 1):1918–30. Available from: https://pubmed.ncbi.nlm.nih.gov/16336556
